# Supplementary material for: Nutritional and Lifestyle Features in a Mediterranean Cohort: An Epidemiological Instrument for Categorizing Metabotypes Based on a Computational Algorithm
Source: MDPI journal article supplement (doi:10.3390/medicina60040610), 2024-04-08
Supplement: s1 [file s1]

Supplementary Materials

**Table S1.** Listing of the 91 predefined groups derived from the questionnaires used in the PLENUFAR 7 project, resulting from the factor analysis.

|                                                                  |
|------------------------------------------------------------------|
| 1. Sex                                                           |
| 2. Main Occupation                                               |
| 3. Weight (kg)                                                   |
| 4. Height (cm)                                                   |
| 5. Pant Size                                                     |
| 6. Shirt Size                                                    |
| 7. Perceived Health                                              |
| 8. What weight do you consider to be healthy for you (in kg)     |
| 9. How many kg do you think you should lose                      |
| 10. How many kg should you gain                                  |
| 11. Race/Ethnicity                                               |
| 12. Educational Level                                            |
| 13. Smoking Habit                                                |
| 14. Whole Dairy                                                  |
| 15. Semi/Skimmed Dairy                                           |
| 16. Eggs                                                         |
| 17. Lean Meats                                                   |
| 18. Fatty Meats                                                  |
| 19. White Fish                                                   |
| 20. Blue Fish                                                    |
| 21. Vegetables                                                   |
| 22. Fruits                                                       |
| 23. Nuts                                                         |
| 24. Legumes                                                      |
| 25. Olive Oil                                                    |
| 26. Other Fats                                                   |
| 27. Refined Cereals                                              |
| 28. Whole Grain Cereals                                          |
| 29. Industrial Pastries                                          |
| 30. Sugars                                                       |
| 31. Alcohol                                                      |
| 32. Water                                                        |
| 33. Wine (Do you drink wine, How much do you consume)            |
| 34. Living Situation                                             |
| 35. Obesity                                                      |
| 36. Diabetes                                                     |
| 37. High Blood Pressure                                          |
| 38. Dyslipidemia                                                 |
| 39. Family History of Obesity                                    |
| 40. Family History of Diabetes                                   |
| 41. Family History of High Blood Pressure                        |
| 42. Family History of Dyslipidemia                               |
| 43. Have you felt sad, discouraged, low in spirits, or depressed |
| 44. Should lose weight                                           |
| 45. Should gain weight                                           |
| 46. Take a nap                                                   |
| 47. Do you usually snack or consume any food between meals       |
| 48. Do you use extra virgin olive oil                            |
| 49. How many servings of vegetables                              |
| 50. How many pieces of fruit (including juice)                   |
| 51. How many servings of red meats                               |
| 52. How many servings of butter                                  |
| 53. How many sugary drinks                                       |
| 54. How many servings of legumes                                 |
| 55. How many servings of fish or seafood                         |
| 56. How often do you consume pastries                            |
| 57. How often do you consume nuts                                |
| 58. Do you preferably consume lean meat                          |
| 59. How many times a week do you consume cooked meals            |
| 60. Do you add sugar to your drinks                              |
| 61. How many servings of white bread                             |
| 62. How many servings of cereals and grains                      |
| 63. How many servings of bread, rice, and/or pasta               |
| 64. Nap Hours on weekdays                                        |
| 65. Nap Hours on weekends                                        |
| 66. Sleep Hours per night on weekdays                            |
| 67. Sleep Hours per night on weekends                            |
| 68. How many years have you smoked or been smoking               |
| 69. How many cigarettes do/did you consume per day               |

|                                                                                      |
|--------------------------------------------------------------------------------------|
| 70. Number of meals per day                                                          |
| 71. Do you use salt at the table when eating                                         |
| 72. Glasses of water per day                                                         |
| 73. How would you rate your health compared to people your age?                      |
| 74. Moderate Efforts, such as moving a table, vacuuming, playing bowling             |
| 75. Climbing several floors by stairs                                                |
| 76. Did you do less than you would have liked due to your physical health?           |
| 77. Did you have to stop doing some tasks at work or in your daily activities        |
| 78. Did you do less than you would have liked due to some emotional problem (sadness |
| 79. Did you not do your work/daily activities as usual due to some problem           |
| 80. To what extent has pain made your usual work difficult (including housework,     |
| 81. How long have you usually felt calm and peaceful?                                |
| 82. How long have you usually had a lot of energy?                                   |
| 83. How long have you usually felt discouraged and sad?                              |
| 84. How often have physical health or emotional problems made it difficult for you   |
| 85. In a normal week, how many days do you do intense physical activities?           |
| 86. How much total time do you usually spend on intense physical activity?           |
| 87. In a normal week, how many days do you do moderate physical activities?          |
| 88. How much total time do you usually spend on moderate physical activity?          |
| 89. In a normal week, how many days do you walk for at least 10 consecutive minutes? |
| 90. How much total time do you usually spend walking on one of those days (h/day)?   |
| 91. In a normal week, how much time do you spend sitting during a workday (h/day)?   |

**Table S2.** Description of the beta coefficients ( $\beta$ ) to be assigned in the algorithm based on the type of variable and its response.

| Beta coefficient ( $\beta$ ) | Variable                     | Type of item                                                                                                                                                                                                                                             |
|------------------------------|------------------------------|----------------------------------------------------------------------------------------------------------------------------------------------------------------------------------------------------------------------------------------------------------|
| n <sup>1</sup>               | Sex                          | <ul style="list-style-type: none"> <li>Male: 0</li> <li>Female: 0.0333</li> </ul>                                                                                                                                                                        |
| n <sup>2</sup>               | Occupation                   | <ul style="list-style-type: none"> <li>Unemployment: 0</li> <li>Full-time student: -0.0403269</li> <li>Permanent illness disability: -0.1127479</li> <li>Retired: 0.024143</li> <li>Homemaker: 0.0383089</li> <li>Paid employment: -0.0590874</li> </ul> |
| n <sup>3</sup>               | Education                    | <ul style="list-style-type: none"> <li>Primary Education or less: 0</li> <li>Secondary Education or High School: -0.0852415</li> <li>Professional training: -0.3086324</li> <li>University Education or more: -0.2239328</li> </ul>                      |
| n <sup>4</sup>               | Smoking                      | <ul style="list-style-type: none"> <li>Non-smoker: 0</li> <li>Quitter smoker: 0.081127</li> <li>Smoker: 0.0378946</li> </ul>                                                                                                                             |
| n <sup>5</sup>               | Cigarettes per day           | <ul style="list-style-type: none"> <li>0: 0</li> <li>0-10 cigarettes: 0</li> <li>11-20 cigarettes: 0.0207365</li> <li>&gt;20 cigarettes: 0.040844</li> </ul>                                                                                             |
| n <sup>6</sup>               | Cohabitation                 | <ul style="list-style-type: none"> <li>Alone: 0</li> <li>Married/cohabitant: -0.0473799</li> <li>With children: -0.0960838</li> <li>With elderly: -0.0490989</li> <li>Other: -0.1287298</li> </ul>                                                       |
| n <sup>7</sup>               | Hours of nap during the week | <ul style="list-style-type: none"> <li>0: 0</li> <li>&lt;30 min/d: 0.3374745</li> <li>30-60 min/d: 0.295221</li> <li>&gt;60min/d: 0.0473886</li> </ul>                                                                                                   |
| n <sup>8</sup>               | Hours of weekend nap         | <ul style="list-style-type: none"> <li>0: 0</li> <li>30 min/d: 0</li> <li>30-60 min/d: -0.0688041</li> <li>&gt;60 min/d: 0.0825323</li> </ul>                                                                                                            |
| n <sup>9</sup>               | Weekday sleep times          | <ul style="list-style-type: none"> <li>&lt;5h: -0.1979225</li> <li>5-6h: 0</li> <li>7-8h: -0.0167996</li> <li>9-10h: 0.0256039</li> <li>&gt;10h: -1.052469</li> </ul>                                                                                    |
| n <sup>10</sup>              | Weekend sleep times          | <ul style="list-style-type: none"> <li>&lt;5h: 0.1696096</li> <li>5-6h: 0</li> <li>7-8h: 0.0069012</li> <li>9-10h: -0.0683897</li> <li>&gt;10h: -0.1035694</li> </ul>                                                                                    |
| n <sup>11</sup>              | Obesity                      | <ul style="list-style-type: none"> <li>No: 0</li> <li>Yes: 0.3792537</li> </ul>                                                                                                                                                                          |
| n <sup>12</sup>              | DMII                         | <ul style="list-style-type: none"> <li>No: 0</li> <li>Yes: 0.2788483</li> </ul>                                                                                                                                                                          |

|                 |                                   |                                                                                                                                                                                     |
|-----------------|-----------------------------------|-------------------------------------------------------------------------------------------------------------------------------------------------------------------------------------|
| n <sup>13</sup> | Hypertension                      | <ul style="list-style-type: none"> <li>No: 0</li> <li>Yes: 0.3480222</li> </ul>                                                                                                     |
| n <sup>14</sup> | Dyslipidemia                      | <ul style="list-style-type: none"> <li>No: 0</li> <li>Yes: 0.3563483</li> </ul>                                                                                                     |
| n <sup>15</sup> | Self-perception of losing weight  | <ul style="list-style-type: none"> <li>No: 0</li> <li>Yes: 0.3929361</li> </ul>                                                                                                     |
| n <sup>16</sup> | Self-perception of gaining weight | <ul style="list-style-type: none"> <li>No: 0</li> <li>Yes: −0.3489201</li> </ul>                                                                                                    |
| n <sup>17</sup> | Snacking                          | <ul style="list-style-type: none"> <li>No: 0</li> <li>Yes: −0.0552395</li> </ul>                                                                                                    |
| n <sup>18</sup> | Number of meals per day           | <ul style="list-style-type: none"> <li>1-2: 0</li> <li>3: 0.1234634</li> <li>4: 0.2261114</li> <li>5: 0.3441373</li> <li>&gt;6: 0.0945412</li> </ul>                                |
| n <sup>19</sup> | Use table salt                    | <ul style="list-style-type: none"> <li>Never: 0.0447343</li> <li>Seldom: 0.0413415</li> <li>Sometimes: 0.0134115</li> <li>Often: 0</li> <li>Usually: 0.0550272</li> </ul>           |
| n <sup>20</sup> | Self-perception of health         | <ul style="list-style-type: none"> <li>Bad: 0</li> <li>Not great: −0.2696505</li> <li>Good: −0.6935279</li> <li>Very good: −0.7753575</li> <li>Great: −0.8175701</li> </ul>         |
| n <sup>21</sup> | Disheartened or sad               | <ul style="list-style-type: none"> <li>Never: −0.2047133</li> <li>Only ever: −0.1942602</li> <li>Sometimes: 0</li> <li>Many times: 0.1442038</li> <li>Always: −0.1599464</li> </ul> |

**Table S3.** Probability of classification in the different clusters by participants of the PLENUFAR 7 project derived from the random forest analysis.

| Clusters                              | Probability of classification |         |                         |                               |                             |
|---------------------------------------|-------------------------------|---------|-------------------------|-------------------------------|-----------------------------|
|                                       | Westernized<br>Millennial     | Healthy | Active<br>Mediterranean | Dysmetabolic<br>or pre-morbid | Metabolically<br>vulnerable |
| <b>Westernized<br/>Millennial</b>     | 81.8%                         | 7.5%    | 4.2%                    | 2.8%                          | 3.7%                        |
| <b>Healthy</b>                        | 7.8%                          | 82.2%   | 4.6%                    | 0.6%                          | 4.7%                        |
| <b>Active<br/>Mediterranean</b>       | 7.1%                          | 7.3%    | 77.3%                   | 3.0%                          | 5.2%                        |
| <b>Dysmetabolic<br/>or pre-morbid</b> | 7.3%                          | 1.6%    | 4.6%                    | 78.3%                         | 8.1%                        |
| <b>Metabolically<br/>vulnerable</b>   | 5.6%                          | 6.7%    | 4.8%                    | 4.7%                          | 78.2%                       |
